# Supplementary material
Source: Springer Nature journal article supplement (https://www.springermedizin.de/resource/supplementary/12885_2006_648_MOESM4_ESM.pdf/9469984)

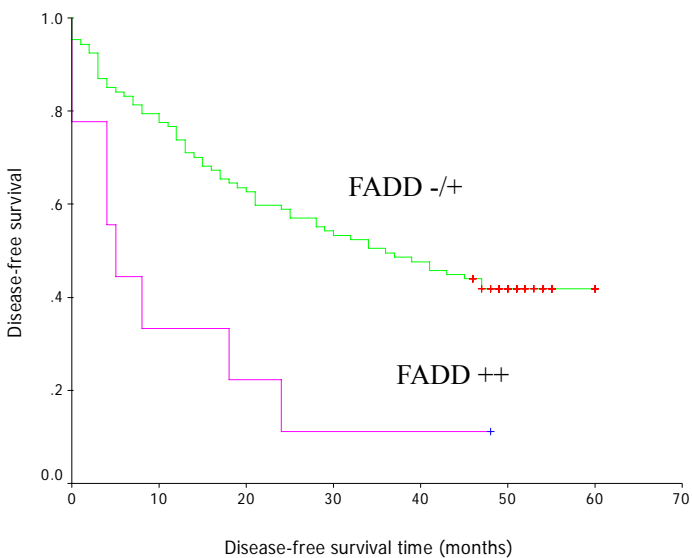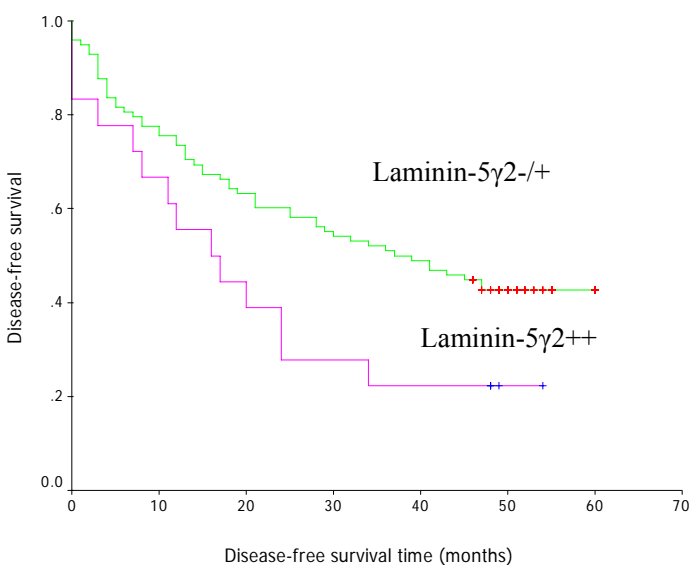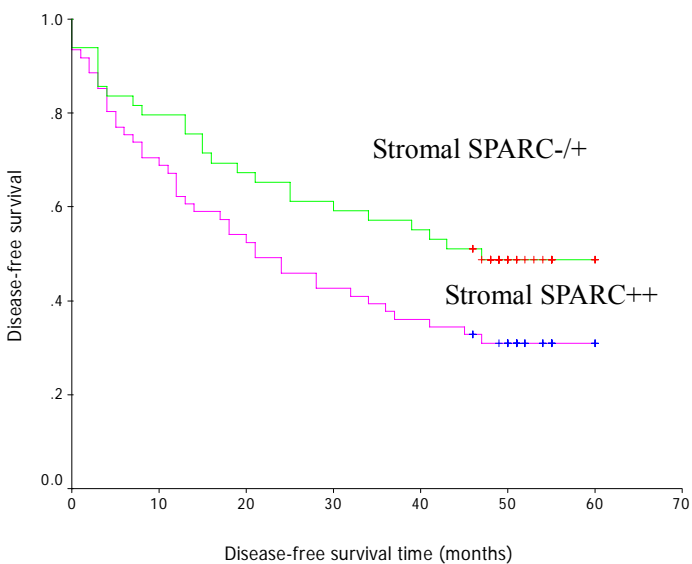

Supplement: MOESM4 [file 9469984]
